# Supplementary material
Source: publisher site journal article supplement (https://www.dovepress.com/article/245346)
Supplement: Supplementary file 1 [file get_supplementary_file.php]

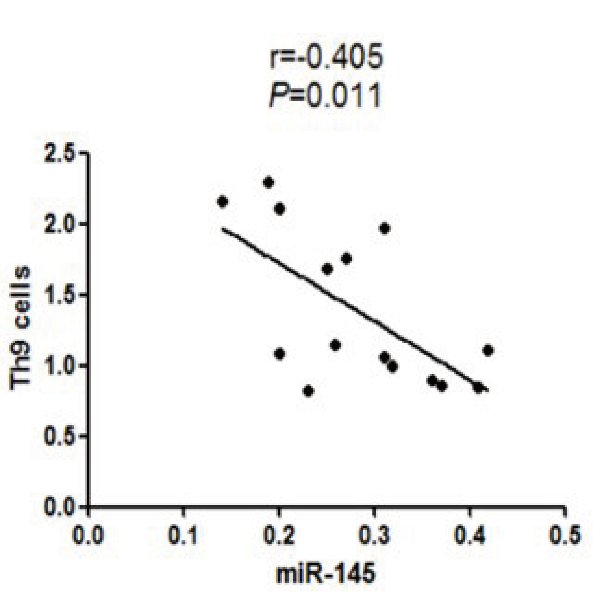


Supplementary Figure 1. In the ascites of patients with liver cancer, the expression of miR-145 showed a negative correlation with the proportion of Th9 cells.
